# Supplementary material
Source: PubMed Central journal article supplement (PMC4285983)
Supplement: JB.02445-14_zjb999093485so1.pdf [file JB.02445-14_zjb999093485so1.pdf]

## SUPPLEMENTARY DATA:

### Supplementary Figures:

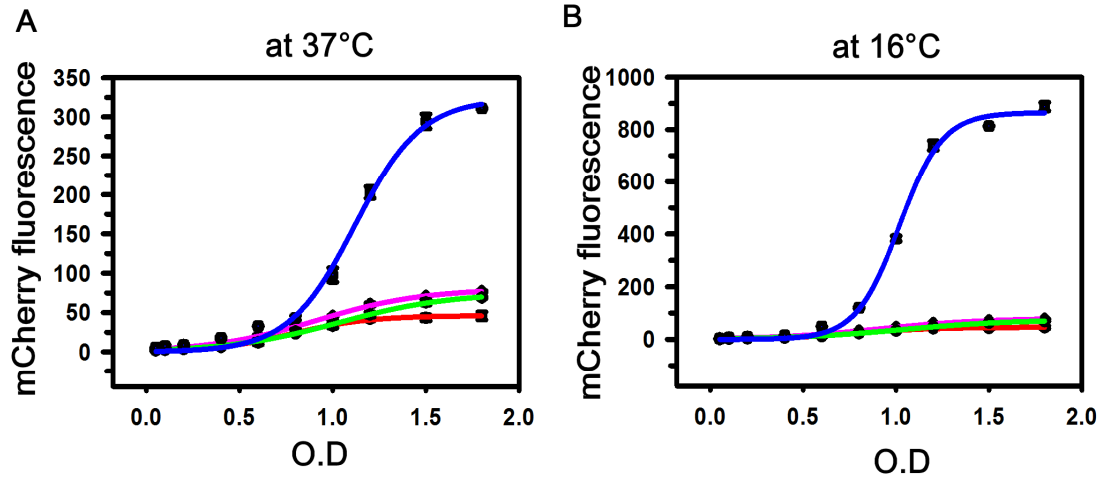

Supplementary Fig. S1, Mukhopadhyay

**Supplementary Fig. S1:** *In vivo* recombinant Mtb reporter assay: Dependence of mCherry expression as a function of *E. coli* growth:

A. Fluorescent intensity of mCherry was measured at regular intervals and plotted as a function of OD. Fluorescent intensity gets saturated at OD (595) = 1.5. Red Line: pFPVmCherry *sinP3*, Green Line: RNAP core + pFPVmCherry *sinP3*, Pink line: Mtb  $\sigma^A$  + pFPVmCherry *sinP3*, Blue line: RNAP-holo + pFPVmCherry *sinP3*. Assays were conducted at 37°C for 6 hours.

B. Same as (A), assays were conducted at 16°C for 16 hours.

The data represents the mean of three replicates and error bars represent standard deviations.

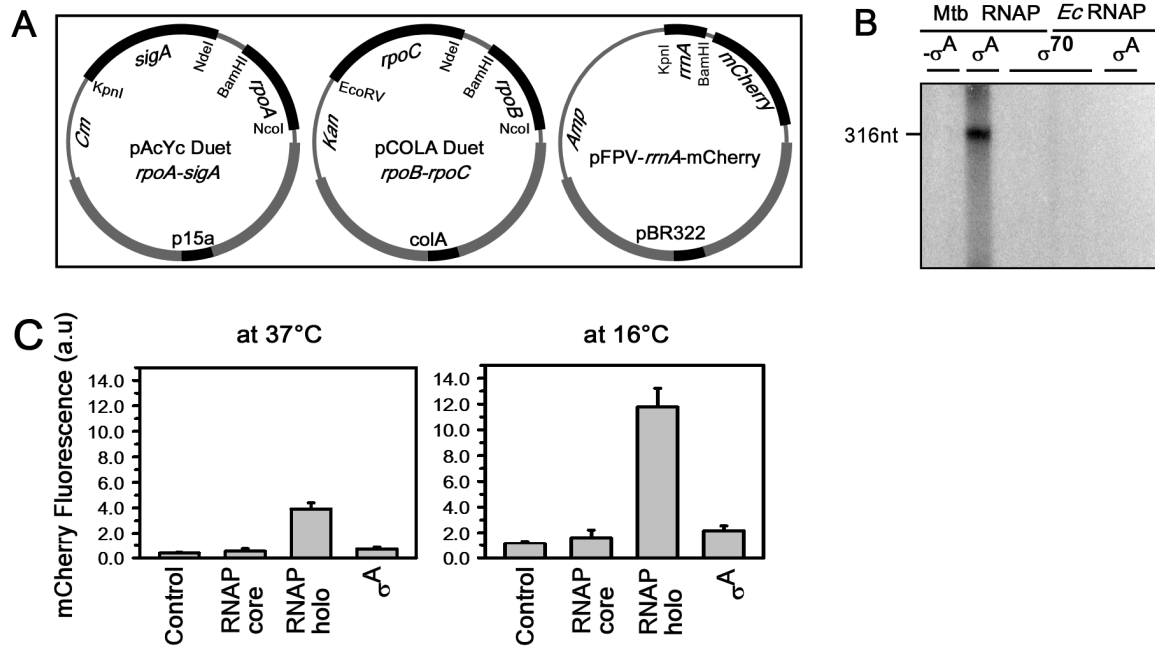

Supplementary Fig. S2, Mukhopadhyay

**Supplementary Fig. S2:** Recombinant *in vivo* Mtb reporter assay in *E. coli* using Mtb  $\sigma^A$  specific promoter *rrnA*:

- A. Strategy: three plasmid expression system, dual plasmid (first two plasmids) for expression of Mtb RNAP holo and the third plasmid containing a  $\sigma^A$  dependent promoter element *rrnA* for expression of mCherry. All three plasmids were transformed in *E. coli* B121 (DE3) cells and then the cells were grown at 37°C up to OD (at 595 nm) 0.4 and induced with 0.5 mM IPTG at different growth conditions.
- B. *In vitro* transcription assay to assess the interactions between Mtb core and *E. coli*  $\sigma^{70}$  and *E. coli* RNAP core with Mtb  $\sigma^A$ . *rrnA* was used as a DNA fragment. Run-off transcripts of 316 nucleotides (nt) were produced. Lane 1: Mtb RNAP core, Lane 2: Mtb RNAP core + Mtb  $\sigma^A$ , Lane 3: Mtb RNAP core + *E. coli*  $\sigma^{70}$ , Lane 4: *E. coli* RNAP + *E. coli*  $\sigma^{70}$ , Lane 5: *E. coli* RNAP + Mtb  $\sigma^A$ .
- C. Results for recombinant Mtb reporter assays: The bars represent mCherry fluorescence of *E. coli* cells containing pFPVmCherry-*rrnA* plasmid in presence of the following; 1. No Mtb RNAP; 2. Mtb RNAP core (pAcYc Duet *rpoA-rpoZ* + pCOLA Duet *rpoB-rpoC*); 3. Mtb RNAP holo (as in Fig. S2); 4.  $\sigma^A$ : (pAcYc Duet-*sigA*). The data represents the mean of three replicates and error bars represent standard deviations.
- Left panel: cells were induced with 0.5 mM IPTG at 37°C for 6 hrs.  
 Right panel: cells were induced with 0.5 mM IPTG at 16°C for 16 hrs.  
 The data represents the mean of three replicates and error bars represent standard deviations.

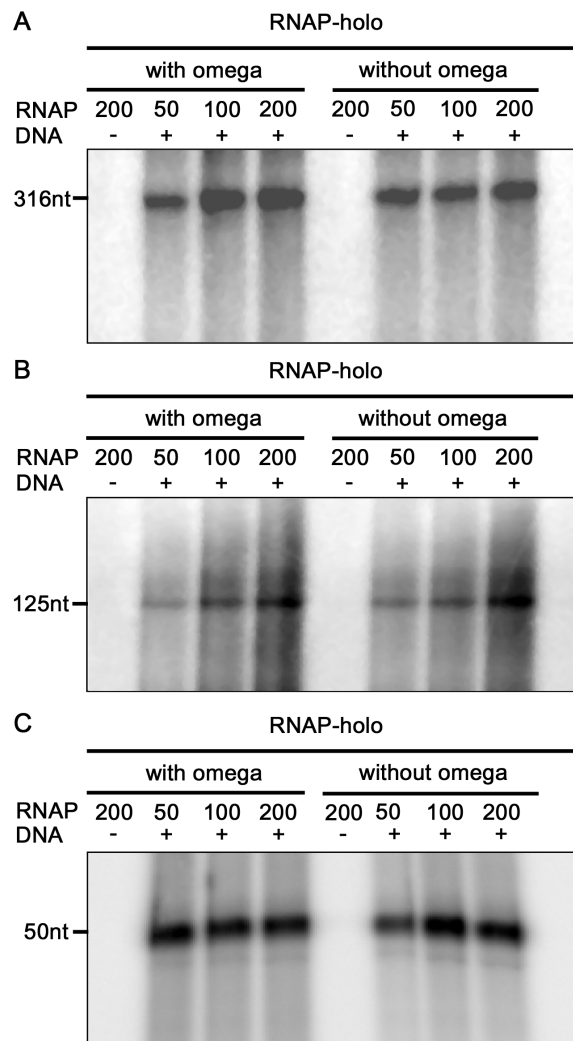

Supplementary Fig. S3, Mukhopadhyay

**Supplementary Fig. S3:** Effect of  $\omega$  subunit on *in vitro* transcriptional activity of Mtb RNAP:

Assays were performed with the purified Mtb RNAP holo (with and without  $\omega$  subunit) samples.

- A. Assays with RNAP- $\sigma^A$  holo and *rrnA* promoter DNA fragment. Lane 1, 5: No DNA, Lane 2-4: RNAP holo with  $\omega$  subunit; Lane 6-8: with RNAP holo without  $\omega$  subunit. Run-off transcripts were 316 nt.
- B. Same as (A) with Mtb CRP dependent promoter *WhiB1*. Mtb CRP was incubated with RNAP holo before open complex formation. Run-off transcripts were 125 nt.
- C. Same as (A) with RNAP-*sigE* holo enzyme and *sigE* dependent promoter *SigBpr*. Run-off transcripts were 50 nt.

**Supplementary Table S1: Oligonucleotides used in this study:**

| <b>Name of the primer</b>              | <b>Sequences</b>                     |
|----------------------------------------|--------------------------------------|
| <b>pFPV-mCherry <i>sinP3</i> fwd</b>   | GAATTCCAGCCAGAAGTCATACCGTA           |
| <b>pFPV-mCherry <i>sinP3</i> rv</b>    | GGATCCGTATTTCGGTTTCATGTTTCT          |
| <b>pFPVmcherry <i>rrnA</i> fwd</b>     | TCTGGTACCTCGTGGAGAACCTGGTGAGTC       |
| <b>pFPVmcherry <i>rrnA</i> rv</b>      | TCTGGATCCTACGCCGCCAGCGTTCGT          |
| <b>pBlueScriptII <i>sigBpr</i> fwd</b> | CGTCTGTTGGCCGCG                      |
| <b>pBlueScriptII <i>sigBpr</i> rv</b>  | CCCTTGTGGGTGCATCGG                   |
| <b>pBSII- <i>WhiB1</i> fwd</b>         | GCTCTAGAGCAAGAAAGCGGATCTG            |
| <b>pBSII- <i>WhiB1</i> rv</b>          | GCAAGCTTGCCTTGTGGCGCCAATC            |
| <b>pET 28a-Mtb CRP fwd</b>             | CATCCGGAATTCGTGGACGAGATCCTGGCC       |
| <b>pET 28a-Mtb CRP rv</b>              | CATCATACTCGAGCACTATTACCTCGCTCGGCGGGC |
| <b>pET 28a-<i>E. coli</i> CRP fwd</b>  | CGAAACATATGGTGCTTGGCAAACCGCA         |
| <b>pET 28a-<i>E. coli</i> CRP rv</b>   | GCGTTGGATCCAATTTAACGAGTGCCGT         |
| <b>pFPV mCherry-CRP fwd</b>            | CCCGCGAAATTAATACGACTCACTATAGGGG      |
| <b>pFPV mCherry-CRP rv</b>             | TTAAAGCTTTTACCTCGCTCGGCGG            |
| <b>pAcYc Duet <i>sigA</i> fwd</b>      | GGAATTCGTGGCAGCGACCAAAG              |
| <b>pAcYc Duet <i>sigA</i> rv</b>       | ATAAGAATGCGGCCGCTCAGTCCAGGTA         |
| <b>pAcYc Duet <i>sigE</i> fwd</b>      | CCAGGATCCGAATTCCATCATGGAACCTCCTCGG   |
| <b>pAcYc Duet <i>sigE</i> rv</b>       | CCGAGGAGTTCCATGATGGAATTCGGATCCTGG    |

**Supplementary Table S2: Cloning strategies:**

| Name of the plasmid                 | Restriction enzymes used and cloning strategies      | Source of gene              |
|-------------------------------------|------------------------------------------------------|-----------------------------|
| pCOLA <i>rpoB-rpoC</i>              |                                                      | Banerjee <i>et al</i> (24)* |
| pAcYc Duet <i>rpoA-rpoZ</i>         |                                                      | Banerjee <i>et al</i> (24)* |
| pAcyC Duet <i>rpoA- sigA</i>        |                                                      | Banerjee <i>et al</i> (24)* |
| pCDF 1b <i>rpoZ</i>                 |                                                      | Banerjee <i>et al</i> (24)* |
| pAcYc Duet <i>rpoA- sigE</i>        | <i>rpoA</i> :NcoI & BamHI; <i>sigE</i> : EcoRV &XhoI | Genomic DNA                 |
| pFPVmcherry- <i>sinP3</i>           | <i>sinP3</i> : EcoRI & BamHI                         | Synthetic DNA               |
| pFPVmcherry- <i>rrnA</i>            | <i>rrnA</i> : KpnI & BamHI                           | Verma <i>et al</i> (21)**   |
| pFPV mcherry- <i>sigBpr</i>         | <i>sigBpr</i> : KpnI & BamHI                         | Genomic DNA                 |
| pFPV-mcherry- <i>WhiB1</i>          | <i>WhiB1</i> : KpnI & BamHI                          | Genomic DNA                 |
| pFPV-mcherry- <i>WhiB1</i> -CRP     | <i>Rv3676</i> : EcoRV & Hind III                     | Genomic DNA                 |
| pET 28a-Mtb CRP                     | <i>Rv3676</i> : EcoRI & XhoI                         | Genomic DNA                 |
| pET 28a- <i>E. coli</i> CRP         | <i>CRP</i> : NdeI & BamHI                            | Genomic DNA                 |
| pAcyC Duet- <i>sigA</i>             | <i>sigA</i> : EcoRI & NotI;                          | Genomic DNA                 |
| pAcyC Duet- <i>sigE</i>             | <i>sigE</i> : EcoRV &XhoI                            | Genomic DNA                 |
| pBluescript II Sk(+)- <i>WhiB1</i>  | <i>WhiB1</i> :SmaI                                   | Genomic DNA                 |
| pBluescript II Sk(+)- <i>rrnA</i>   | <i>rrnA</i> : SmaI                                   | Genomic DNA                 |
| pBluescript II Sk(+)- <i>sigBpr</i> | <i>SigBpr</i> :SmaI                                  | Genomic DNA                 |

**Supplementary Reference:**

\* **Banerjee R, Rudra P, Prajapati RK, Sengupta S, Mukhopadhyay J.** 2014. Optimization of recombinant Mycobacterium tuberculosis RNA polymerase expression and purification. *Tuberculosis* (Edinb) **94**:397-404.

\*\***Verma A, Sampla AK, Tyagi JS.** 1999. Mycobacterium tuberculosis *rrn* promoters: differential usage and growth rate-dependent control. *Journal of bacteriology* **181**:4326-4333.
